# Supplementary material for: Targeting a STING agonist to perivascular macrophages in prostate tumors delays resistance to androgen deprivation therapy
Source: PubMed Central journal article supplement — J Immunother Cancer. 2024 Jul 25;12(7):e009368. doi: 10.1136/jitc-2024-009368 (PMC11284826; doi:10.1136/jitc-2024-009368), 2024-07-25
Supplement: jitc-12-7-s001.pdf [file jitc-12-7-s001.pdf]

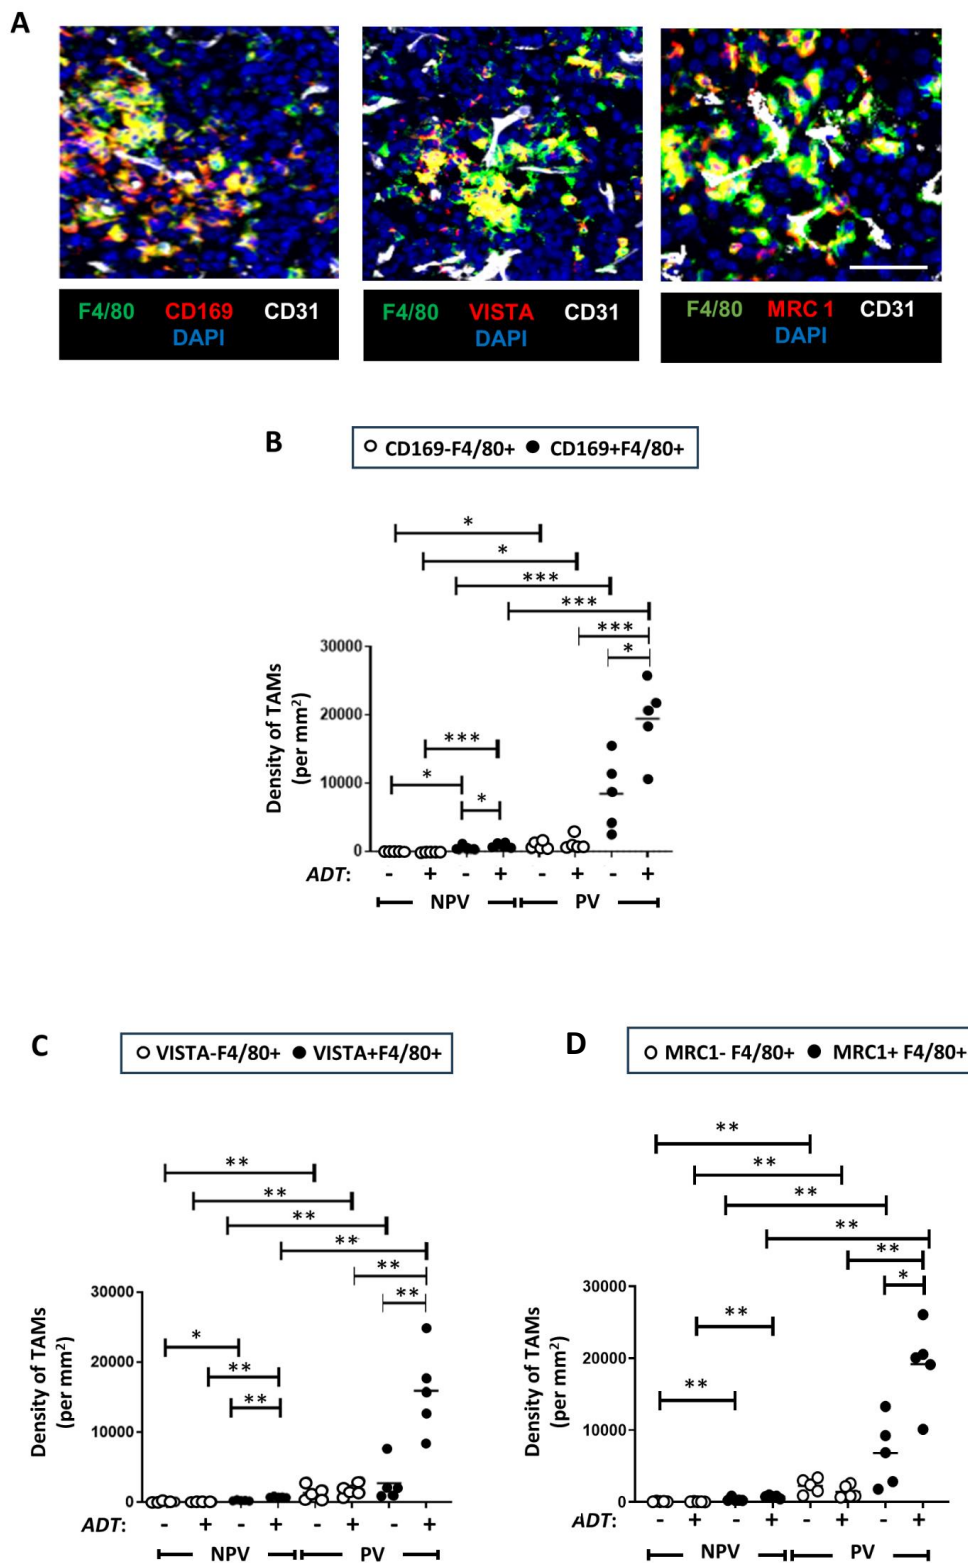

**Suppl. Figure 1. PV F4/80+ TAMs also express CD169, VISTA and MRC1 in Myc-CaP tumors.** (A) Representative fluorescence images showing the co-localization of F4/80 with CD169, VISTA or MRC1 in vascularised tumor areas in ADT-treated tumors. Bar = 50µm. Quantitative analysis revealed the high density of TAMs expressing the following in PV areas after ADT: (B) F4/80 and CD169, (C) F4/80 and VISTA, and (D) F4/80 and MRC1. Data are presented as means ± SEMs. \*p < 0.05, \*\*p < 0.01, and \*\*\*p < 0.001.
