# Supplementary material for: Targeting a STING agonist to perivascular macrophages in prostate tumors delays resistance to androgen deprivation therapy
Source: PubMed Central journal article supplement — J Immunother Cancer. 2024 Jul 25;12(7):e009368. doi: 10.1136/jitc-2024-009368 (PMC11284826; doi:10.1136/jitc-2024-009368), 2024-07-25
Supplement: jitc-12-7-s002.pdf [file jitc-12-7-s002.pdf]

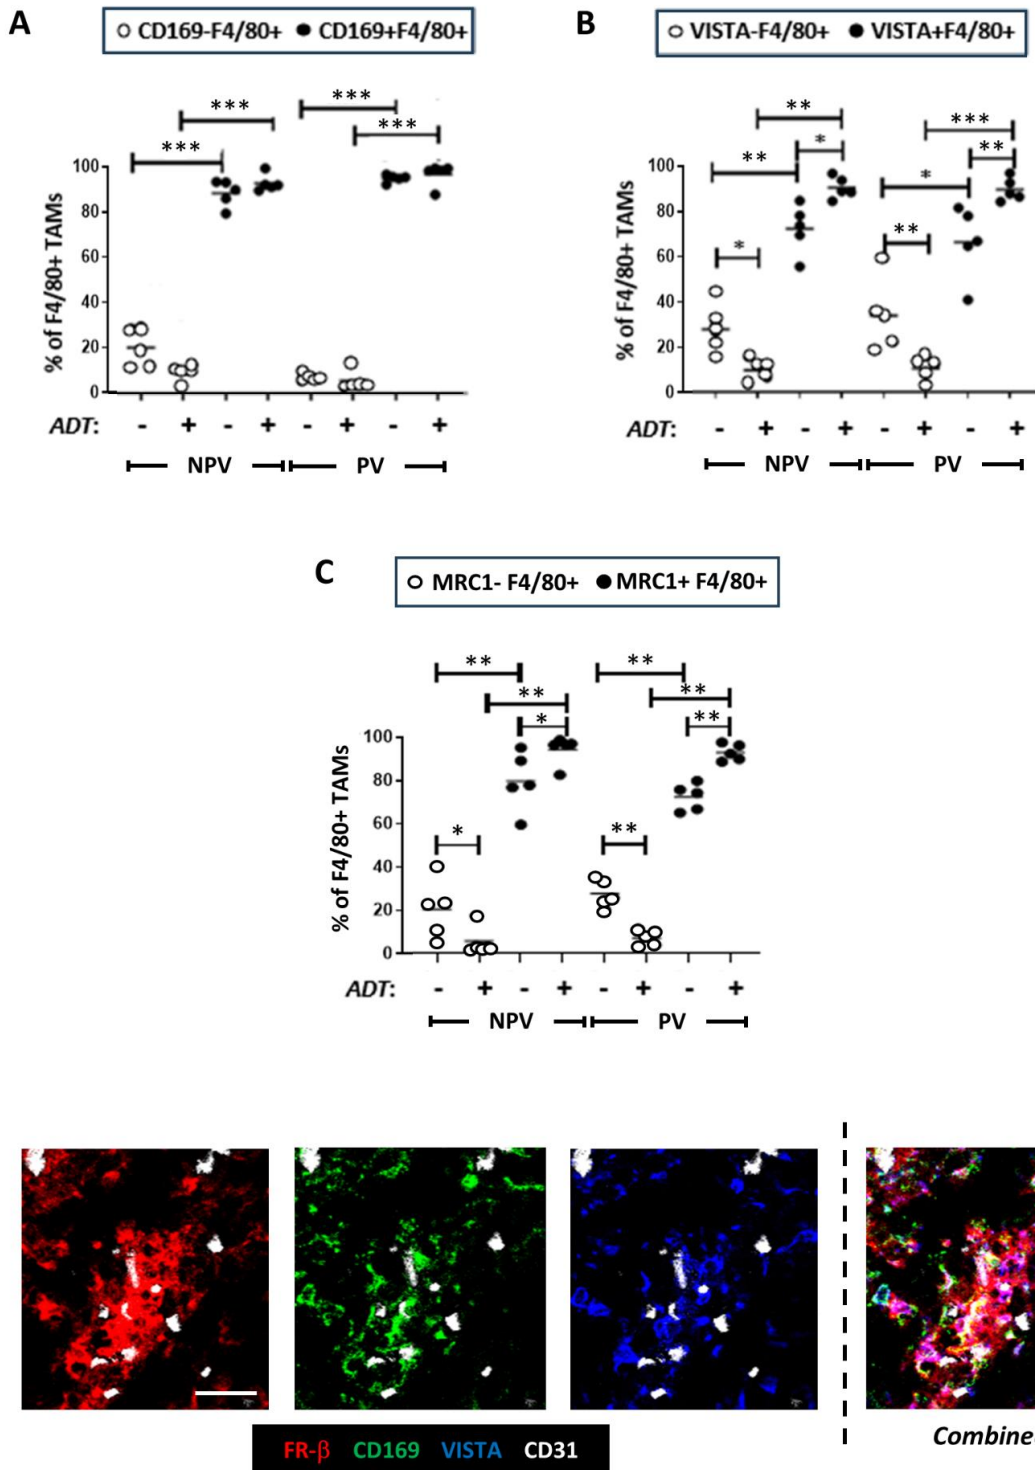

**Suppl. Figure 2. PV F4/80+ TAMs co-express CD169, VISTA, MRC1 and FR- $\beta$  in Myc-CaP tumors.** Quantitative analysis showed a similar proportion of F4/80+ TAMs expressing either: (A) CD169, (B) VISTA, and (C) MRC1 in both PV and non-PV areas of tumors. Data are presented as means  $\pm$  SEMs. \* $p < 0.05$ , \*\* $p < 0.01$ , and \*\*\* $p < 0.001$ . (D) Representative fluorescence images showing the co-localization of F4/80 with FR- $\beta$ , CD169 and VISTA in a vascularised tumor area of an ADT-treated tumor. Bar = 50 $\mu$ m.
