# Supplementary material for: Targeting a STING agonist to perivascular macrophages in prostate tumors delays resistance to androgen deprivation therapy
Source: PubMed Central journal article supplement — J Immunother Cancer. 2024 Jul 25;12(7):e009368. doi: 10.1136/jitc-2024-009368 (PMC11284826; doi:10.1136/jitc-2024-009368), 2024-07-25
Supplement: jitc-12-7-s003.pdf [file jitc-12-7-s003.pdf]

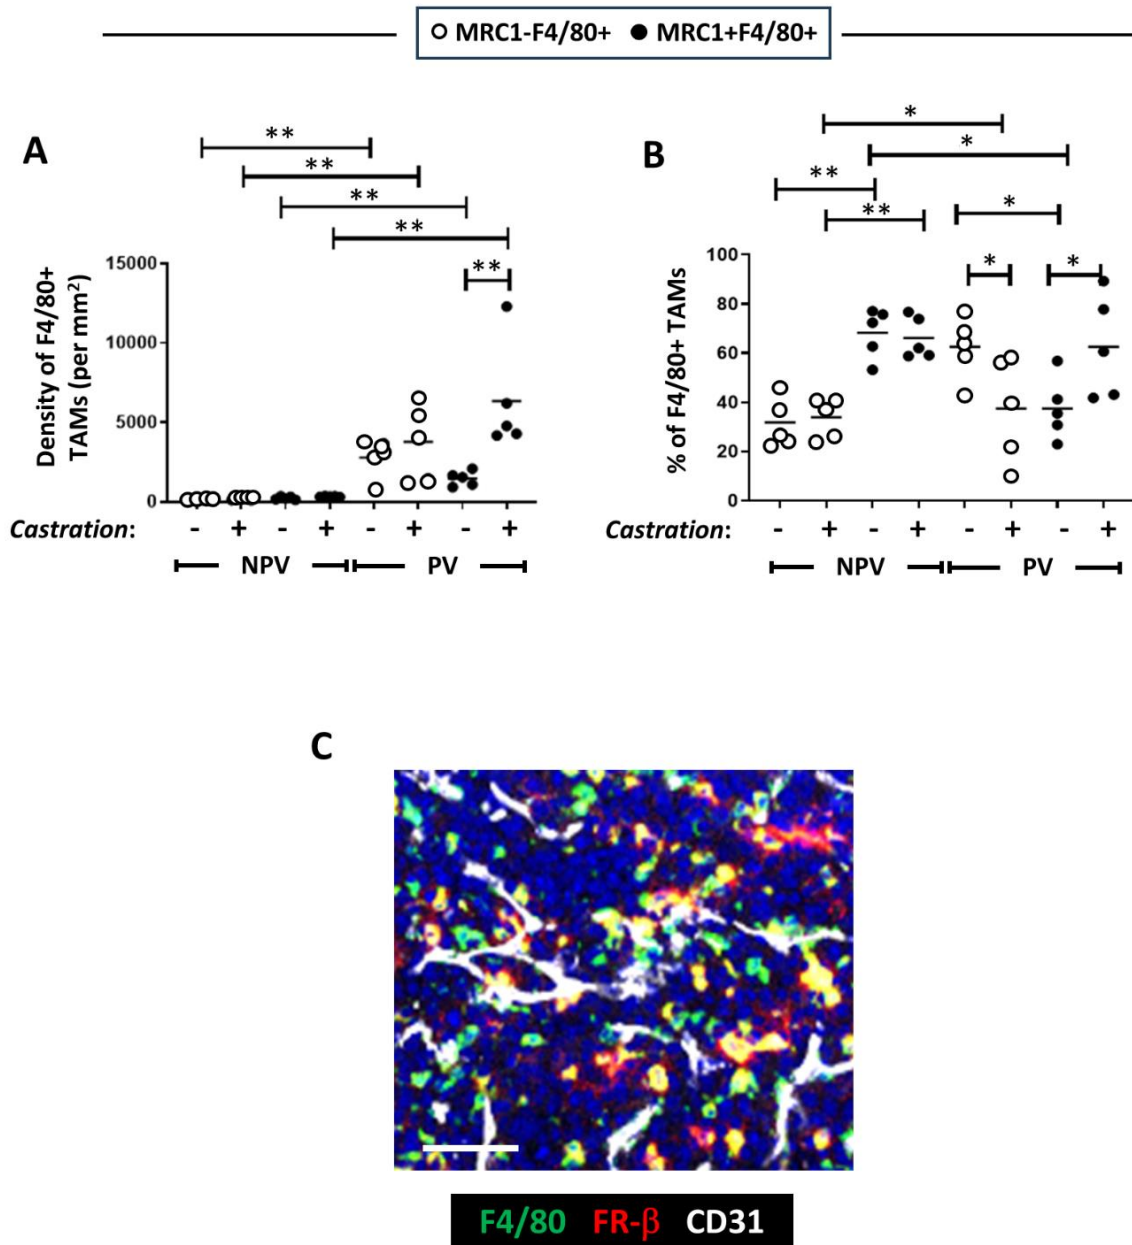

**Suppl. Figure 3. Effect of physical castration on TAM distribution in transgenic mouse prostate (*Pten<sup>fl/fl</sup>*) tumors.** The density (A) or proportion (B) F4/80+ TAMs expressing MRC1 in PV and non-PV (NPV) areas of tumors in sham-castrated or castrated mice. Data are presented as means  $\pm$  SEMs. \* $p < 0.05$  and \*\* $p < 0.01$ . (C) The majority of PV F4/80+ TAMs in ADT-treated tumors also expressed FR- $\beta$ . Bar = 50 $\mu$ m.
