# Supplementary material for: Targeting a STING agonist to perivascular macrophages in prostate tumors delays resistance to androgen deprivation therapy
Source: PubMed Central journal article supplement — J Immunother Cancer. 2024 Jul 25;12(7):e009368. doi: 10.1136/jitc-2024-009368 (PMC11284826; doi:10.1136/jitc-2024-009368), 2024-07-25
Supplement: jitc-12-7-s004.pdf [file jitc-12-7-s004.pdf]

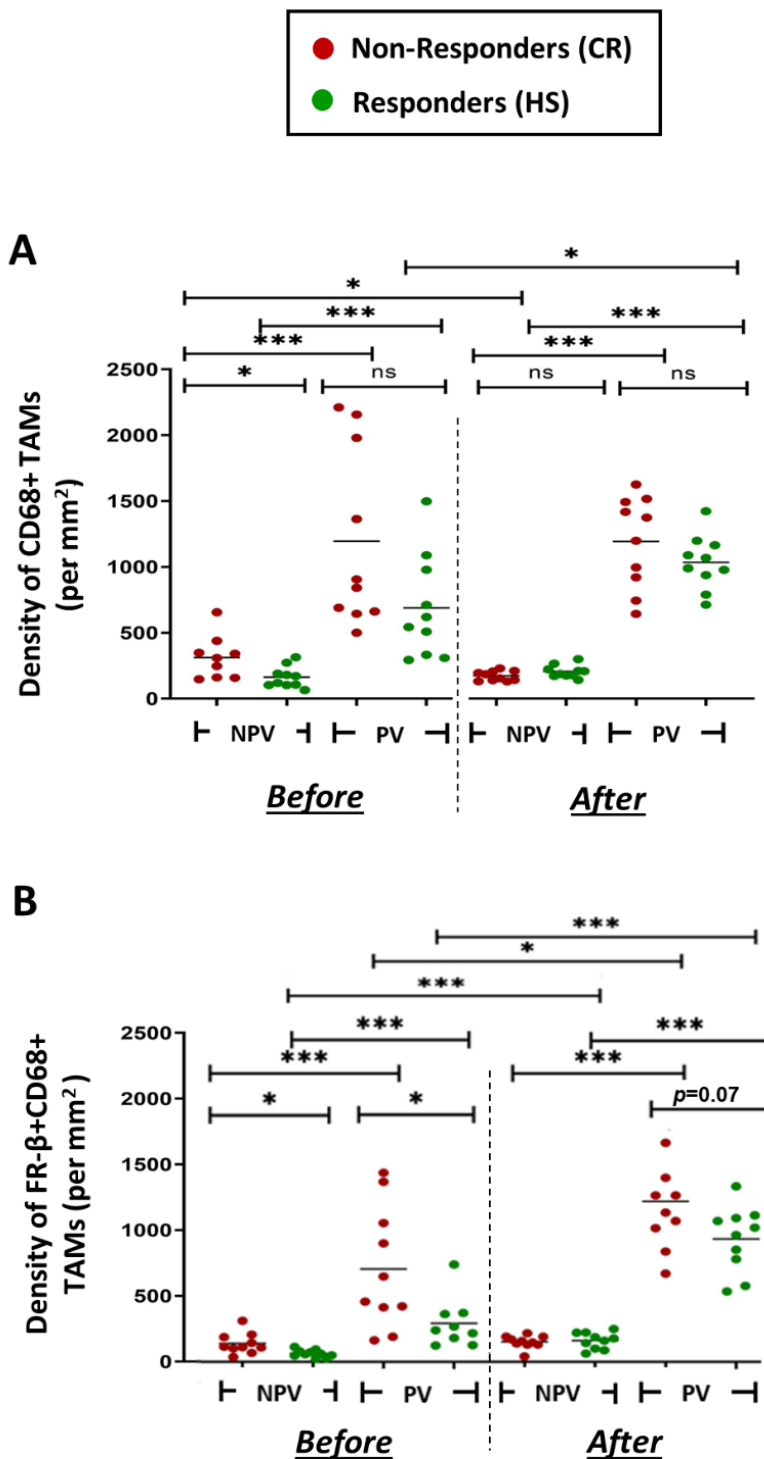

**Suppl. Figure 4. FR-β expression by PV CD68+TAMs in localised human prostate tumors before and after ADT: correlation with tumor response.** (A) CD68+ TAMs and (B) FR-β+CD68+ TAMs were predominantly PV both before and after patients received ADT (ie. matching samples). Tumors showing signs of CR (ie. starting to regrow within six months of ADT treatment - termed 'non-responders') were also compared to those that were still responsive to ADT (ie. hormone sensitive, 'HS' - termed 'responders'). Data are presented as means ± SEMs. \* $p < 0.05$  and \*\*\* $p < 0.001$ . 'ns' = not significant.
