# Supplementary material for: Targeting a STING agonist to perivascular macrophages in prostate tumors delays resistance to androgen deprivation therapy
Source: PubMed Central journal article supplement — J Immunother Cancer. 2024 Jul 25;12(7):e009368. doi: 10.1136/jitc-2024-009368 (PMC11284826; doi:10.1136/jitc-2024-009368), 2024-07-25
Supplement: jitc-12-7-s005.pdf [file jitc-12-7-s005.pdf]

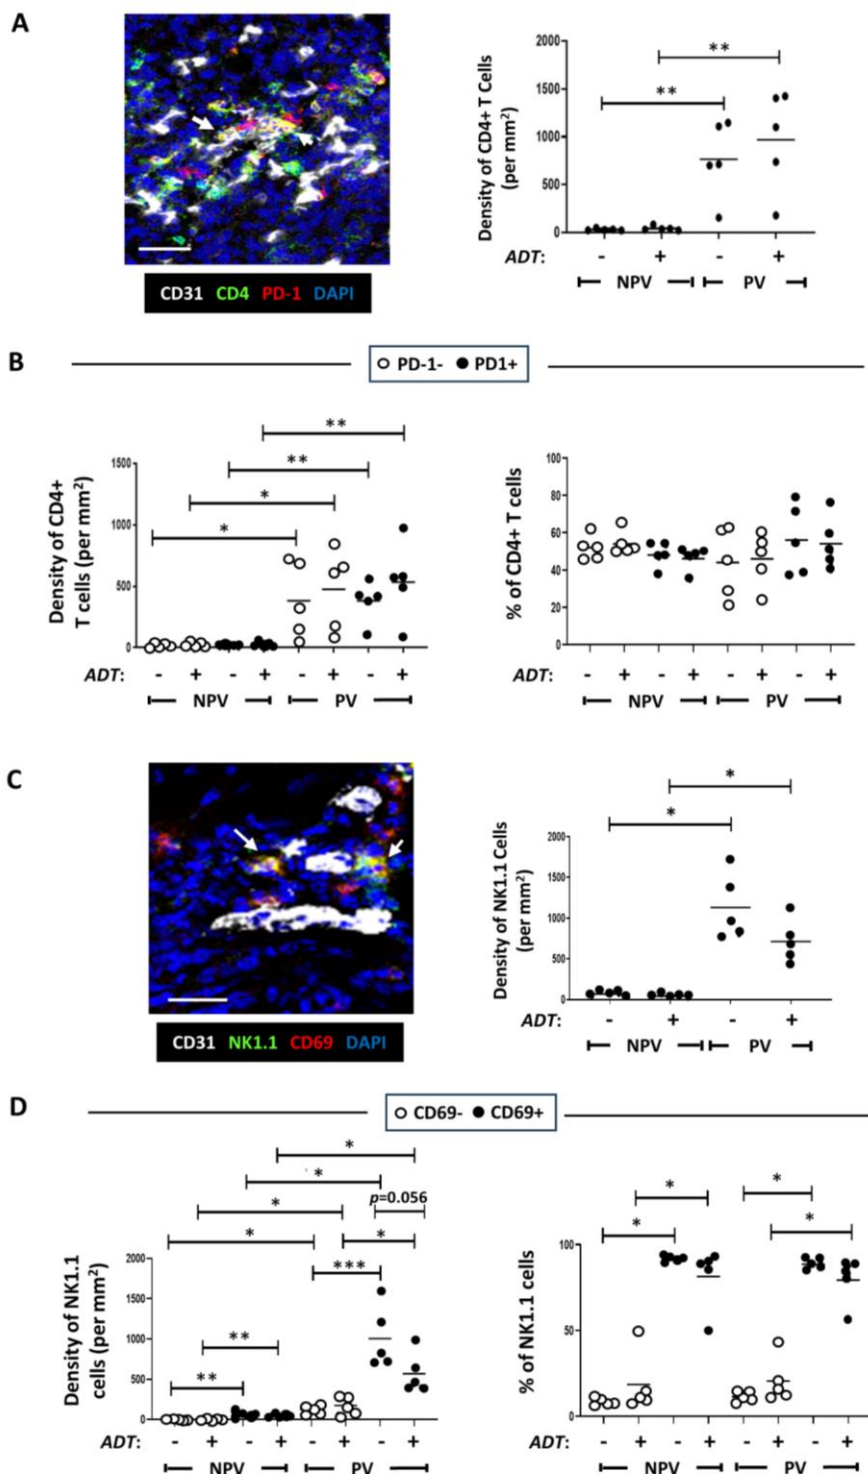

**Suppl. Figure 5. Effect of ADT on the distribution and activation status of CD4+ T cells and NK cells in Myc-CaP tumors.** (A) Representative fluorescence image of the co-localization of CD4 and PD-1 in a vascularised area of an ADT-treated tumor. (B) Density (left panel) and proportion of CD4+ T cells expressing PD-1 in PV and non-PV (NPV) areas. (C) Representative fluorescence image of the co-localization of NK1.1 and CD69 in a vascularised area of an ADT-treated tumor. (D) Density (left panel) and proportion (right panel) of NK cells expressing CD69 in PV and non-PV (NPV) areas. Data are presented as means  $\pm$  SEMs. \* $p < 0.05$ , \*\* $p < 0.01$ , and \*\*\* $p < 0.001$ . Bars = 50 $\mu$ m.
