# Supplementary material for: Targeting a STING agonist to perivascular macrophages in prostate tumors delays resistance to androgen deprivation therapy
Source: PubMed Central journal article supplement — J Immunother Cancer. 2024 Jul 25;12(7):e009368. doi: 10.1136/jitc-2024-009368 (PMC11284826; doi:10.1136/jitc-2024-009368), 2024-07-25
Supplement: jitc-12-7-s007.pdf [file jitc-12-7-s007.pdf]

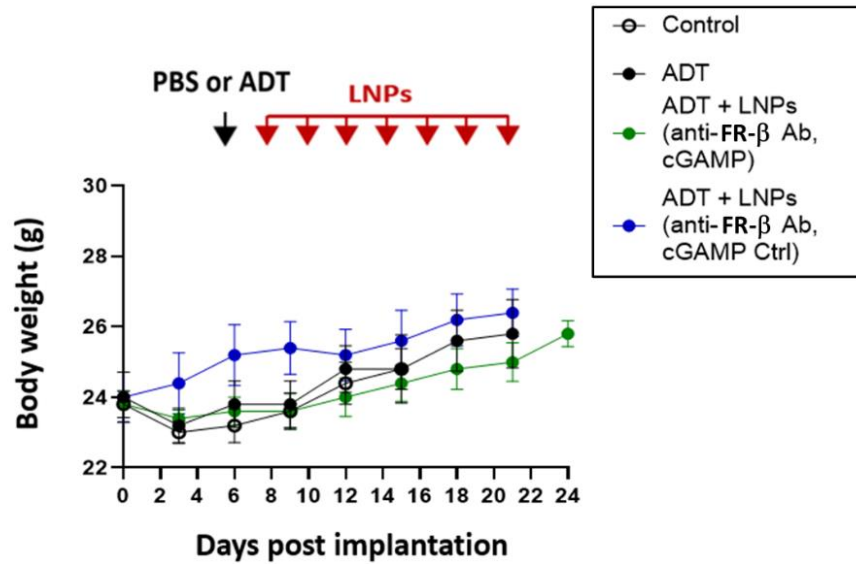

**Suppl. Fig. 7. Neither ADT nor LNPs were toxic *in vivo*.** Neither ADT no ADT plus LNPs coated with FR $\beta$  antibody (containing either active or inactive cGAMP) altered mouse body weight.
