# Supplementary material for: Targeting a STING agonist to perivascular macrophages in prostate tumors delays resistance to androgen deprivation therapy
Source: PubMed Central journal article supplement — J Immunother Cancer. 2024 Jul 25;12(7):e009368. doi: 10.1136/jitc-2024-009368 (PMC11284826; doi:10.1136/jitc-2024-009368), 2024-07-25
Supplement: jitc-12-7-s008.pdf [file jitc-12-7-s008.pdf]

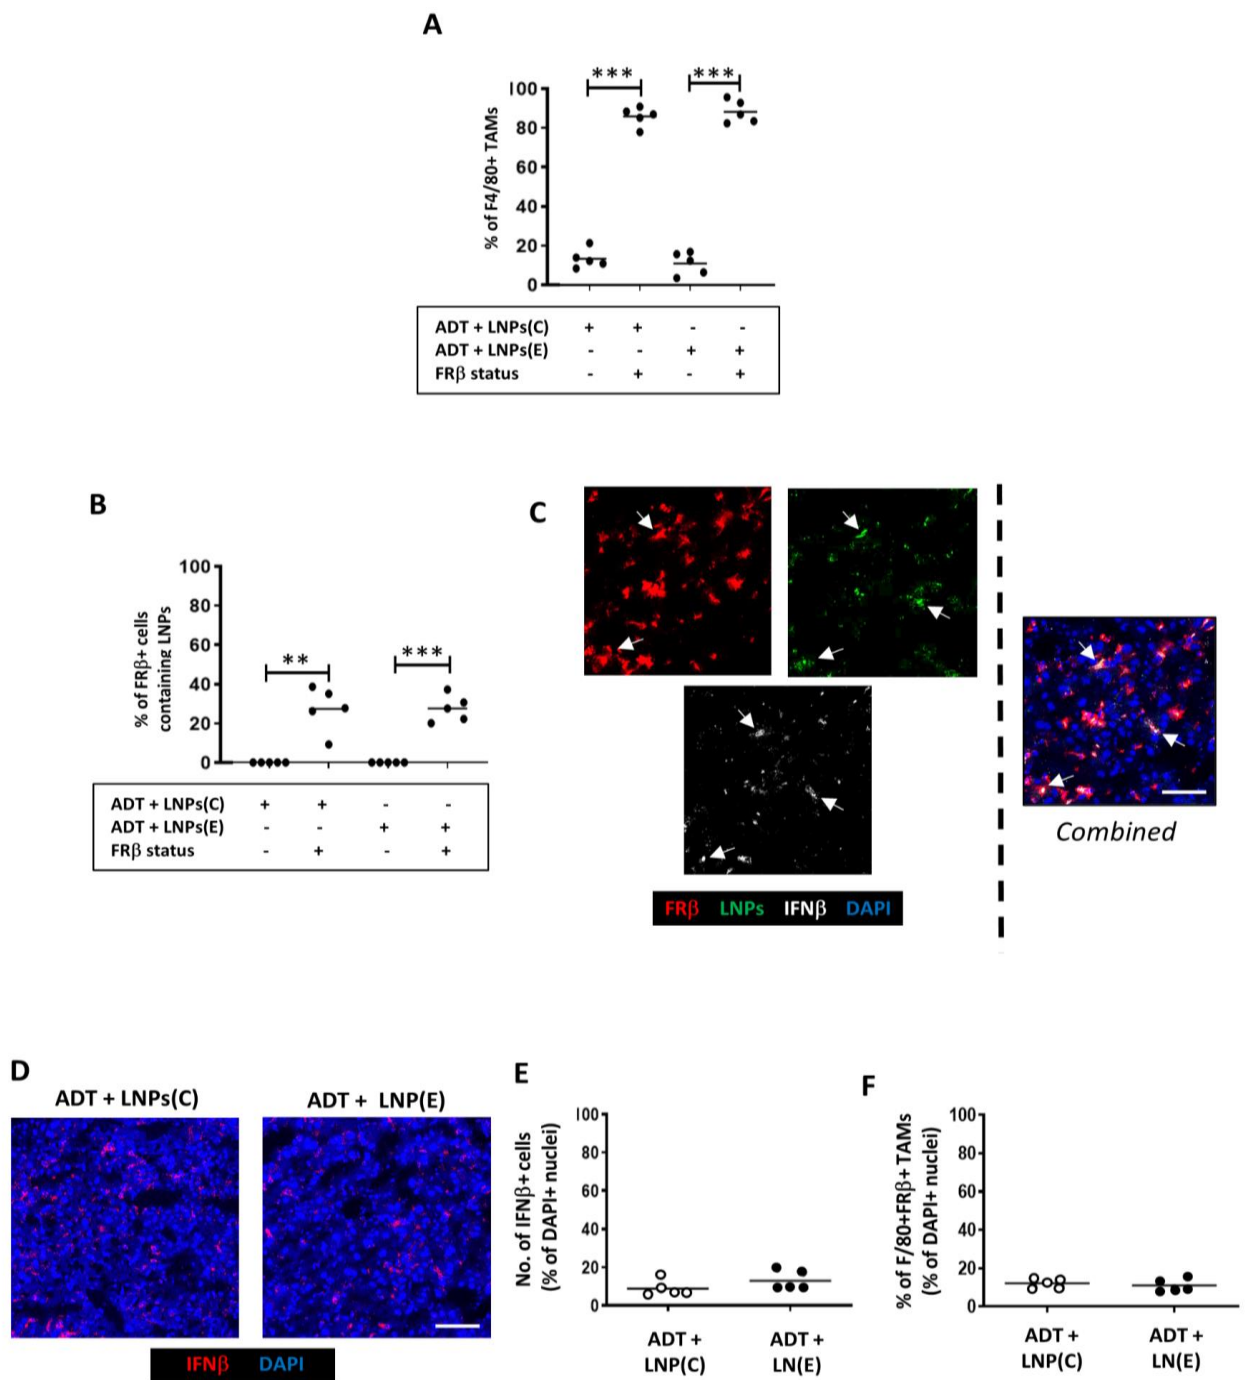

**Suppl. Fig. 8. Minimal expression of IFN $\beta$  in the liver of mice bearing Myc-CaP tumors following administration of ADT plus LNPs. (A)** The majority (>80%) of F4/80+ Kupffer cells in the liver expressed FR- $\beta$  in mice administered ADT plus LNPs containing either active (LNPs(E)) or inactive (LNPs(C)) cGAMP. However, LNPs (B) and IFN $\beta$  (white arrows in C) were only detected in approx. 20% of FR- $\beta$ + cells. Overall, IFN $\beta$  staining was detected in 10-20% of all nucleated cells in the liver of mice administered ADT plus LNPs(E) (D&E). This matched the proportion of all nucleated cells in the liver that were FR- $\beta$ +F4/80+ macrophages (F). Data are presented as means  $\pm$  SEMs. \* $p$  < 0.05, \*\* $p$  < 0.01, and \*\*\* $p$  < 0.001. Bars = 50 $\mu$ m.
