# Supplementary material for: Targeting a STING agonist to perivascular macrophages in prostate tumors delays resistance to androgen deprivation therapy
Source: PubMed Central journal article supplement — J Immunother Cancer. 2024 Jul 25;12(7):e009368. doi: 10.1136/jitc-2024-009368 (PMC11284826; doi:10.1136/jitc-2024-009368), 2024-07-25
Supplement: jitc-12-7-s009.pdf [file jitc-12-7-s009.pdf]

|                                                                                                      | London -<br>(untreated; No ADT) | London -<br>ADT treated | Harvard<br>Non-responders | Harvard<br>Responders |
|------------------------------------------------------------------------------------------------------|---------------------------------|-------------------------|---------------------------|-----------------------|
| <b>Age at diagnosis</b>                                                                              |                                 |                         |                           |                       |
| 40-59                                                                                                | 2                               | 2                       | 5                         | 4                     |
| 60-79                                                                                                | 3                               | 3                       | 5                         | 5                     |
| 80-99                                                                                                | 1                               | 0                       | 0                         | 0                     |
| <b>Gleason score at RP/TURP</b>                                                                      |                                 |                         |                           |                       |
| 6                                                                                                    | 1                               | 0                       | 0                         | 0                     |
| 7                                                                                                    | 2                               | 1                       | 1                         | 2                     |
| 8                                                                                                    | 0                               | 1                       | 4                         | 2                     |
| 9                                                                                                    | 3                               | 2                       | 5                         | 5                     |
| 10                                                                                                   | 0                               | 1                       | 0                         | 1                     |
| <b>Stage at RP/TURP</b>                                                                              |                                 |                         |                           |                       |
| T0                                                                                                   | 0                               | 0                       | 0                         | 5                     |
| T1                                                                                                   | 0                               | 0                       | 0                         | 0                     |
| T2                                                                                                   | 1                               | 0                       | 0                         | 5                     |
| T3a                                                                                                  | 2                               | 0                       | 6                         | 0                     |
| T3b                                                                                                  | 1                               | 2                       | 4                         | 0                     |
| T4                                                                                                   | 0                               | 2                       | 0                         | 0                     |
| UNK                                                                                                  | 2                               | 1                       |                           |                       |
| <b>Metastatic at RP/TURP:</b>                                                                        |                                 |                         |                           |                       |
| Yes                                                                                                  | 0                               | 3                       | 0                         | 0                     |
| No                                                                                                   | 6                               | 2                       | 0                         | 0                     |
| <b>Treatments</b>                                                                                    |                                 |                         |                           |                       |
| <b>ICR:</b>                                                                                          |                                 |                         |                           |                       |
| LHRH inhibitors (Leuprolide,<br>Goserelin or Triptorelin)<br><i>Dana Faber Cancer<br/>Institute:</i> | 6                               | 5                       | -                         | -                     |
| Group 1: Abiraterone +<br>Predisone + Enzalutamide +<br>Leuprolide                                   | -                               | -                       | 3                         | 3                     |
| Group 2: Enzalutamide +<br>Leuprolide                                                                | -                               | -                       | 3                         | 1                     |
| Group 3: Abiraterone +<br>Predisone + Apalutamide +<br>Leuprolide                                    | -                               | -                       | 1                         | 2                     |
| Group: Abiraterone +<br>Predisone + Leuprolide                                                       | -                               | -                       | 3                         | 4                     |

**Suppl. Table. Clinicopathological data for the anonymised patient groups whose tumor sections were stained and analysed in Figures 2 and 3.** These were supplied by the Institute of Cancer Research (ICR) in London, UK and the Dana Faber Cancer Institute in Boston, USA. Abbreviations used: ADT, androgen deprivation therapy; RP, radical prostatectomy; TURP, Transurethral resection of the prostate, LHRH, luteinising hormone-releasing hormone.
